## Could baseline electrical parameters be a marker of arrhythmia occurrence and poorer prognosis in implantable cardioverter defibrillator patients?

Zecchin M.<sup>1</sup>; Solimene F.<sup>2</sup>; D'onofrio A.<sup>3</sup>; Zanoletto G.<sup>4</sup>; Iacopino S.<sup>5</sup>; Pignalberi C.<sup>6</sup>; Calvi V.<sup>7</sup>; Maglia G.<sup>8</sup>; Della Bella P.<sup>9</sup>; Quartieri F.<sup>10</sup>; Curnis A.<sup>11</sup>; Biffi M.<sup>12</sup>; Giacomelli D.<sup>13</sup>; Gargaro A.<sup>13</sup>; Pisano E.<sup>14</sup>

<sup>1</sup>Azienda Sanitaria Universitaria Integrata di Trieste, Cardiology, Trieste, Italy

<sup>2</sup>Montevergine Cardiology Clinic, Mercogliano, Italy

<sup>3</sup>AO dei Colli-Monaldi Hospital, Cardiology, Naples, Italy

<sup>4</sup>Mater Salutis Hospital, Legnago, Italy

<sup>5</sup>Maria Cecilia Hospital, Cotignola, Italy

<sup>6</sup>San Filippo Neri Hospital, Rome, Italy

<sup>7</sup>Ferrarotto Hospital, Catania, Italy

<sup>8</sup>Azienda Ospedaliera Pugliese-Ciaccio, Catanzaro, Italy

<sup>9</sup>San Raffaele Hospital, Milan, Italy

<sup>10</sup>Santa Maria Nuova Hospital, Reggio Emilia, Italy

<sup>11</sup>Civil Hospital of Brescia, Brescia, Italy

<sup>12</sup>Azienda Ospedaliero, Universitaria di Bologna, Policlinico S.Orsola-Malpighi, Bologna, Italy

<sup>13</sup>BIOTRONIK Italy, Vimodrone, Italy

<sup>14</sup>Vito Fazzi Hospital, Lecce, Italy

**Funding Acknowledgements:** This research did not receive any specific grant from funding agencies in the public, commercial, or not-for-profit sectors.

**Background/Introduction:** Parameters routinely measured during cardiac devices implantation also depend on bioelectrical properties of the myocardial tissue.

**Purpose:** To explore the potential association of electrical parameters with clinical outcomes in implantable cardioverter-defibrillator (ICD) and cardiac resynchronization therapy defibrillators (CRT-D) recipients.

**Methods:** In the framework of the Home Monitoring Expert Alliance, baseline electrical parameters for all implanted leads were compared by occurrence of all-cause mortality, adjudicated ventricular arrhythmia (VA) and atrial high rate episode lasting  $\geq 7$  days (7day-AHRE).

**Results:** In a cohort of 2,976 patients (58.1% ICD) with a median follow-up of 25 months, events rates were 3.1/100 patient-years for all-cause mortality, 18.1/100 patient-years for VA and 8.9/100 patient-years for 7day-AHRE.

At univariate analysis baseline shock impedance was consistently lower in groups with events than in those without, with a 40 Ohm cut-off better identifying patients at high risk, but at multivariable analysis the adjusted-hazard ratios (HRs) lost statistical significance for any endpoint.

Baseline atrial sensing amplitude during sinus rhythm was lower in patients with 7-day AHRE as compared to those without (2.40 [IQ: 1.62-3.71] Vs 3.50 [IQ: 2.35-4.66] mV,  $p < 0.01$ ). The adjusted-HR for 7-day AHRE in patients with atrial sensing  $> 1.5$  mV versus those with values  $\leq 1.5$  mV was 0.44 (95% CI: 0.27-0.72),  $p = 0.001$ .

**Conclusion:** Despite in patients with events a lower baseline shock impedance was observed at univariate analysis, the association lost statistical significance at multivariable analysis. Conversely, low sinus rhythm atrial sensing ( $\leq 1.5$  mV) measured with standard transvenous leads could identify subjects at high risk of long-lasting atrial arrhythmia.

Abstract Figure. AHRE occurrence by atrial sensing

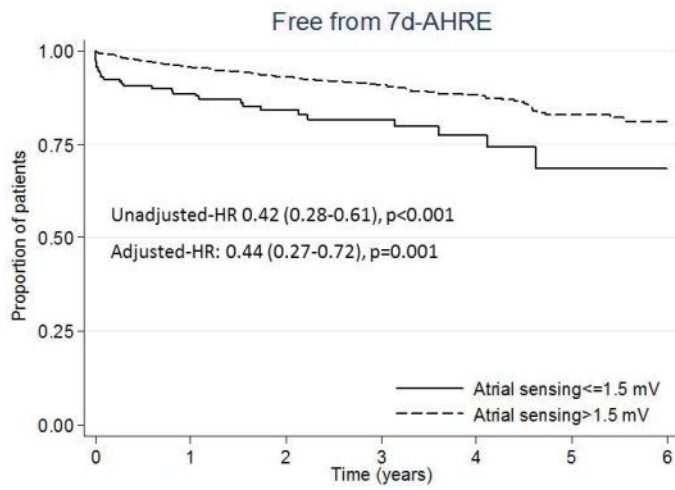

Source: http://academic.oup.com/europace/article-pdf/22/Supplement_1/euaa162.182/33401728/euaa162.182.pdf
